1 **Malaria and other risk factors for malnutrition, and the**  
2 **impact of intermittent preventive therapy for malaria on**  
3 **nutritional status of school-age children in Tanzania. A**  
4 **cross-sectional survey and a randomized controlled**  
5 **open-label trial.**

6 Jeremiah John Hhera<sup>1,3</sup>, Geoffrey Makenga<sup>2,3</sup>, Jean-Pierre Van geertruyden<sup>3</sup>.

7 <sup>1</sup>Mawenzi Regional Referral Hospital, Kilimanjaro, Tanzania.

8 <sup>2</sup>National Institute of Medical Research, Tanga Centre, Tanga, Tanzania.

9 <sup>3</sup>Global Health Institute, University of Antwerp, Antwerp, Belgium.

10 **Abstract**

11 **Background:** WHO and the Lancet reported that malaria and malnutrition form a double health burden  
12 in low and middle-income countries. Despite the massive implementation of several malaria  
13 interventions, there is limited information on the impact of intermittent preventive therapy (IPTsc) for  
14 malaria on the nutritional status of school-age children.

15 **Objective:** To determine malnutrition risk factors and evaluate the impact of IPTsc for malaria on  
16 the nutritional status of school-age children in North-East Tanzania.

17 **Methods:** We analyzed secondary data from a cross-sectional baseline survey and a randomized  
18 controlled open-label trial. Study participants were randomized to three treatment groups and  
19 thereafter followed for 20 months. Data were analyzed using logistic regression and a linear mixed  
20 model.

21 **Findings:** At baseline, the prevalence of malaria was 27%. 23% of  $\leq 10$  years children were  
22 underweight, 21% were stunted, and 28% were either thin or severely thin. The odds of  
23 stunting were 78% higher (AOR=1.78, 95%CI=[1.36, 2.33],  $P < 0.001$ ) among children who had malaria  
24 compared to those who did not. Children from low socioeconomic status (SES) had higher odds of  
25 being underweight (AOR=1.50, 95%CI=[1.13, 2.01],  $P = 0.006$ ) compared to their high SES  
26 counterparts. During the intervention, change in mean weight, height, and BMI over time as  
27 estimated from age-treatment interaction was not significantly different in the DP and ASAQ  
28 treatment groups compared to the control group. A unit change in age increased weight, height,  
29 and BMI by 2.2 units ( $p$ -value  $< 0.001$ ), 3.3 units ( $p$ -value  $< 0.001$ ), and 0.5 units ( $p$ -value  $< 0.001$ ). The  
30 height and weight in female children were higher compared to that of male children by 1 unit ( $p$ -value  
31  $< 0.001$ ) and 0.8 unit ( $p$ -value  $< 0.001$ ), respectively.

32 **Conclusion:** The burden of malaria and malnutrition in this study's setting is remarkable. Instead of  
33 focusing only on malaria, public health agencies should reinforce nutritional programs by collaborating  
34 with local communities to ensure food availability in schools and provide sustainable nutritional  
35 education to the local community members.

36 **Key Words:** Malaria, malnutrition, Intermittent Preventive Therapy, nutrition in children and  
37 adolescents, Tanzania

## 38 **1 Introduction**

39 Malaria is a vector-transmitted disease predominantly distributed in tropical regions. It affects  
40 about 91 countries worldwide [1]. The World Health Organization (WHO) malaria report  
41 documented 227 million malaria cases in 2019 from 85 malaria-endemic countries and 241  
42 million cases in 2020 [2, 3]. 96% of malaria cases and deaths were reported from the African  
43 region, and Tanzania was among the four countries that accounted for almost half the malaria-  
44 related deaths in 2020 [3]. A tremendous burden of malaria has been reported among children  
45 [2]. In malaria-endemic regions, a large proportion of school-age children live with subclinical  
46 malaria and thus a reservoir for malaria parasites [4]. In Muheza, Tanzania, children aged 5-14  
47 years had a malaria prevalence of 39% in 2016 and 26.4% in 2019 [5, 6].

48 Children in lower and middle-income countries (LMICs) have been experiencing a double burden  
49 of malaria infections and malnutrition in the form of undernutrition. Malnutrition is a state of  
50 imbalance of intake of nutrients that leads to measurable adverse effects on body shape,  
51 functions, and clinical outcomes [7]. Body weight and height are the anthropometric indicators  
52 used for measurements to quantify nutritional status. To ensure consistency and comparability,  
53 the preferred units are the standard deviation (referred to as Z-score) of Weight-for-Age (WAZ),  
54 Height-for-Age (HAZ), and Body Mass Index (BMI) [8]. Growth and nutritional assessment are  
55 primarily implemented worldwide in children of 0 to 5 years compared to older children and  
56 adolescents. UNICEF reported that 49.5 million children aged 0 to 5 years had acute  
57 malnutrition globally in 2018 [9]. Although there is limited data on the nutritional status of 5 – 14

58 years old children, the Lancet report on worldwide body mass index (BMI) in 2016  
59 documented the lowest record in South Asia and East Africa, 15.8 kg/m<sup>2</sup> and 16.5 kg/m<sup>2</sup>,  
60 respectively [10]. The level of stunting is still high in LMICs, and the reduction rate is the  
61 lowest in the African region despite several interventional programs [9]. The level of stunting was  
62 reported to be high in 15 regions of the Tanzanian mainland in 2018 [11], and the lake zone  
63 prevalence of wasting was 11.3% and stunting was 29% [12].

64 Malaria-Malnutrition interaction is a complex phenomenon with an inconclusive causal  
65 relationship [13]. Malnutrition increases susceptibility to malaria, and recurrent malaria  
66 infections predispose the affected population to malnutrition [14]. Previous findings showed an  
67 increased risk of malaria in malnourished children. Malaria prevalence was higher among  
68 malnourished children of age  $\leq 5$  years compared to the

69  $\geq 5$  years group [15]. Observational studies from Sub-Saharan Africa and the Amazonian region  
70 reported

71 an increased risk of malaria infection in undernourished school-age children [15, 16]. The relationship  
72 between stunting and malaria occurrence has been contradicting. As noted previously, stunting  
73 before transmission season was not associated with an increase in malaria incidence [17], and the  
74 other study reported that stunting is associated with reduced malaria incidence [16].

75 In the past two decades, malaria control programs have been massively implemented in disease-  
76 endemic areas [1, 2]. The use of drugs and vector-barrier for prevention was focused on  $\leq 5$  years and

77 pregnant mothers [18], rarely involving school-age children. The previous interventions in both areas  
78 of intense perennial and seasonal transmission successfully minimized anemia and parasitemia in  
79 all age groups but did not examine the impact on nutritional status [4, 5, 19, 20]. However, it was  
80 noted in an observational study that treatment of severe malaria using artemisinin-based  
81 combinations improved nutritional status among children with severe acute malnutrition [21].

82 Generally, previous studies conducted mainly on children under five suggest an association  
83 between malaria and malnutrition. However, to the best of our knowledge, only a limited  
84 number of malaria-malnutrition studies included school-age children, and most malaria  
85 interventions did not address its impact on the nutritional status of school-age children.  
86 Therefore, we analyzed data from a baseline survey and randomized clinical trial using  
87 dihydroartemisinin-piperaquine (DP) and artesunate-amodiaquine (ASAQ) to, primarily,  
88 determine the association between malaria and malnutrition.

89 The hypothesis for this study was that there is an association between malaria and malnutrition  
90 in school-age children, and that the use of intermittent preventive therapy (IPTsc) for malaria  
91 improves nutritional status among school-age children. The specific objectives that guided our  
92 work were (i). To determine the prevalence of malnutrition and factors associated with  
93 malnutrition among school-age children (ii). To explore the attribution of malaria on low Weight-  
94 for-Age (WAZ), Height-for-Age (HAZ), and BMI in school-age children (iii). To evaluate the impact  
95 of IPTsc on the trend of weight, height, and BMI in school-age children.

## 96 **2 Methods**

### 97 **2.1 Design and study population**

98 We analyzed the secondary data from a cross-sectional baseline survey and a randomized  
99 controlled open-label trial. The preliminary study aimed to assess the effectiveness and safety of  
100 two anti-malarial drugs for malaria prevention in school children. In this 3-arm trial using a  
101 "balanced block design," Dihydroartemisinin-piperaquine (DP) and Artesunate-amodiaquine  
102 (ASAQ) were used with the "standard of care" as a reference arm. The trial design and methods  
103 were described in a published study protocol [22] that was registered on clinical trials.gov-  
104 NCT03640403. The intervention continued for 12 months following recruitment. The study  
105 participants were followed for an extra 8 months to observe rebound effects and late adverse  
106 events due to interventional drugs.

107 The study targeted children of age between 5 to 15 years. Most children in this age range are  
108 enrolled in primary schools, making school-age children our source population. The following  
109 eligibility criteria were adopted from the study protocol [22], and children who met the criteria  
110 were included in the study.

#### 111 **2.1.1 Inclusion criteria**

- 112 • Male and female primary school children in a selected school

- 113 • Includes parental/guardian informed consent.
- 114 • Assent by primary school children aged 11 years and above.
- 115 • Aged 5–15 years at the baseline assessment.
- 116 • Currently, he/she lives within the pre-defined catchment area of Muheza District.
- 117 • Will remain within the same area throughout the study period (preferably pupils of class
- 118 five and below).

### 119 **2.1.2 Exclusion criteria**

120 Participants with at least one of the following criteria were excluded:

- 121 • Pupils of class/grade 6 or 7
- 122 • Currently enrolled in another study or participated in another investigational drug study
- 123 within the last 30 days.
- 124 • Known to have heart disease or a known cardiac ailment.
- 125 • Reports known hypersensitivity to the study drugs or any sulphonamides.
- 126 • Not willing to undergo all study procedures including physical examination and to provide
- 127 blood samples as per this study protocol.
- 128 • Having clinical features of severe anemia

- 129 • Has apparent severe infection or any condition that requires hospitalization
- 130 • Illness or conditions like haematologic, cardiac, renal, and hepatic diseases which in the
- 131 judgement of the investigator would subject the participant to undue risk or interfere with
- 132 the results of the study, including known G6PD deficiency and sickle cell traits.
- 133 • Body weight <14 kg

## 134 **2.2 Study setting**

135 The study was conducted in Muheza district, Tanga, Tanzania. The geographical location is in the  
136 northeastern part of Tanzania, where malaria transmission occurs almost throughout the year,  
137 full description can be accessed elsewhere [22].

## 138 **2.3 Ethical approval**

139 The study acquired regulatory approval from the Medical Research Coordination Committee  
140 (MRCC) of the National Institute of Medical Research (NIMR), Tanzania. The initial approval based  
141 on the protocol was granted on 20<sup>th</sup> July 2018. The study protocol was amended and the  
142 committee reviewed and approved it on 19<sup>th</sup> March 2019 with validity date on 19<sup>th</sup> July 2019.  
143 However, based on the progress report of July 2019, the ethical clearance committee granted  
144 study extension until 20<sup>th</sup> July 2020. The study approval numbers were  
145 NIMR/HQ/R.8a/Vol.IX/2818 and NIMR/HQ/R.8c/Vol.I/668 (for amendment) also  
146 NIMR/HQ/R.8c/Vol.I/1276 for ethical clearance extension.



## 147 **2.4 Study procedures**

148 During the baseline phase, pupils' age, sex, level of education (grade in school), and residential  
149 address were recorded in case report forms after consent was granted. Given that participants  
150 were children, written informed consent was obtained from children' parents. Children aged 11  
151 or older were asked to assent. Further participants' information and household characteristics  
152 were inquired from the parents when the study team visited homes to capture satellite locations  
153 using the Global Positioning System (GPS) and socioeconomic evaluation.

### 154 **2.4.1 Intervention**

155 During the intervention, the treatment was either dihydroartemisinin-piperazine (DP) or  
156 Artesunate amodiaquine (ASAQ). These drugs have no plausible causal relation to the nutritional  
157 status except when there is malaria infection as an intermediate variable. The malaria  
158 prevention dosage was given for three days in a directly observed manner, that is, by a study  
159 nurse and a trained teacher who would provide the drugs on subsequent days. Another tablet  
160 was given and documented when a child vomited within 30 minutes after ingesting a pill.  
161 Tanzania's national malaria treatment and diagnostic guideline  
162 [23] considers DP and ASAQ as the alternative to first-line Artemether Lumefantrine (ALU) in  
163 treating uncomplicated malaria. In the case of malaria-confirmed illness, all children were  
164 treated using ALU except on the trial drugs dispensing days when those on DP and ASAQ  
165 groups were kept on the same drugsto treat uncomplicated malaria. The national guideline was  
166 followed in managing severe malaria [23]. Details on manufacturers' instructions for these drugs,

167 reporting, and handling of severe adverse events (SAE), and the laboratory procedures of  
168 malaria parasite investigation were described elsewhere [22].

#### 169 **2.4.2 Outcome**

170 The body weight and height that were measured during the trial were used to quantify  
171 nutritional status. A standard stadiometer and a weighing scale were used for measurements.  
172 The tools were calibrated by a trained staff before and after use to minimize measurement  
173 errors. The weight-for-age, height-for-age, and body mass index (BMI)-for-age Z-scores (WAZ and  
174 HAZ, ZBMI respectively) were calculated and used to classify the nutritional status. The BMI was  
175 first calculated as;

$$176 \quad \text{BMI} = \text{weight in kilograms}/(\text{height in meters})^2$$

177 and the respective anthropometric index Z-scores were calculated using the 'egen' STATA  
178 function as described elsewhere [24, 25]. These Z-scores are the international standard for  
179 growth measurements derived by comparing individual growth measurements versus growth  
180 data from the reference or normal population, adjusted for age and sex. The standard deviations  
181 are normally categorized based on clinical relevance; <-3SD (severely underweight, severely  
182 stunted, severely thin), <-2SD to -3SD (underweight, stunted, thin), -2SD to +2SD (normal  
183 nutritional status), >+2SD to +3SD (overweight), and >+3SD (Obese) [26]. According to the  
184 WHO, WAZ nutritional index can be used up to the age of 10 years [26]. HAZ can be used from

185 birth through the adolescent period, and ZBMI Z-score is not recommended for the age of 2  
186 years and below. The exposure-outcome relationship has been summarized in Figure 1 using  
187 Directed-Acyclic Graphs (DAGs).

## 188 **2.5 Statistical Analysis**

189 In this study, we analyzed baseline and longitudinal data that were collected from the same study  
190 participants. The methods of analysis were selected based on the nature of the data and the  
191 outcome variables of interest. Weight and height were summarized as median and categorical data  
192 were reported in proportions. Logistic regression and linear mixed models were applied in the  
193 data analysis to determine associations and the impact of anti-malaria prophylaxis on the  
194 nutritional status of children.

### 195 **2.5.1 Logistic regression**

196 Both univariable and multi-variable logistic regressions were used to determine the association  
197 between malaria and other risk factors with the nutritional indices. Univariable logistic regression  
198 was fitted to investigate the effect of a single covariate on causing underweight, stunting, or  
199 thinness status. For inclusion in the multivariable logistic model, covariates that had a p-value  
200  $<0.25$  were included as proposed by Hosmer and Lemeshow [27]. Multi-collinearity was checked  
201 using a generalized inflation factor (GVIF), and backward logistic regression was performed to  
202 build a parsimonious model. GVIF values were approximately 1 for all included variables,  
203 suggestive of no collinearity. In the process, a variable with a p-value greater than the

204 significance level of 5% was dropped, and models were compared using a likelihood ratio test at  
 205 each stage. A goodness of fit was checked using the Hosmer-Lemeshow goodness of fit test.

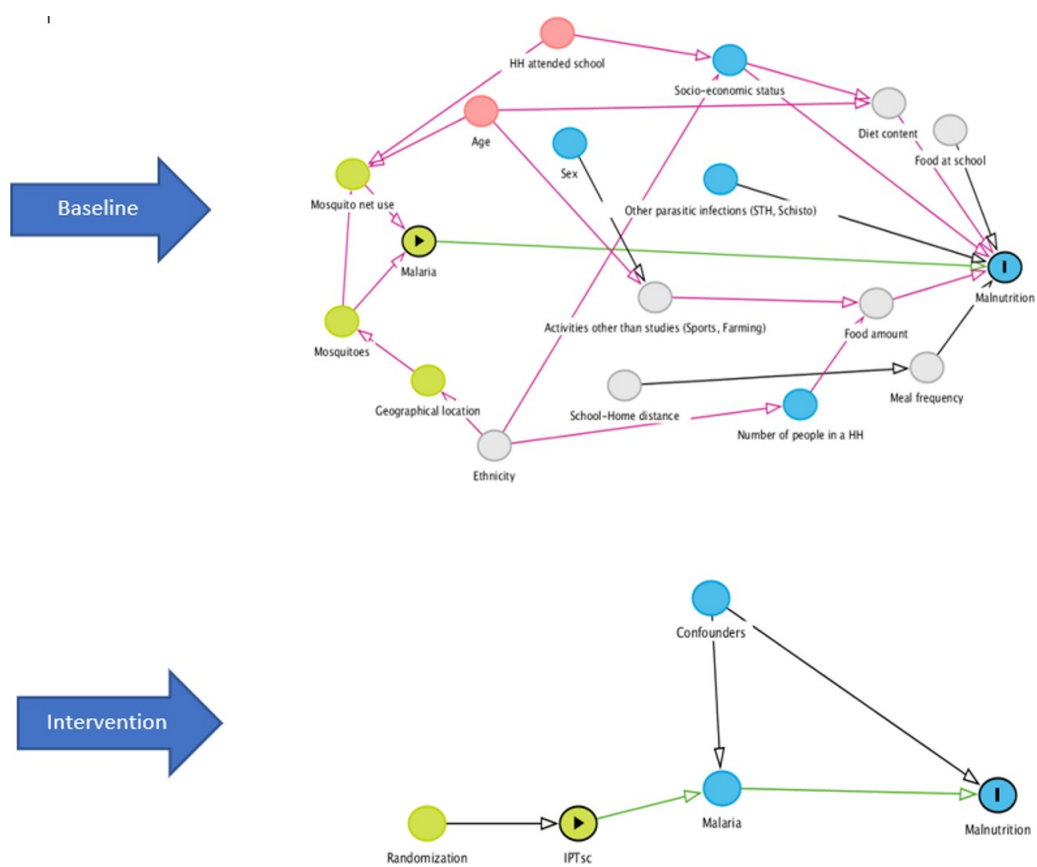

206  
 207 Figure 1: The Directed-Acyclic Graphs (DAGs) showing the exposure-outcome relationship for both  
 208 baseline and interventional phase of our study.

209 In addition, the attributable fraction (AF) (also known as attributable risk proportion (ARP))  
 210 was estimated for the variables that remained statistically significant in the adjusted analysis.  
 211 By definition, AF is a measure that quantifies the proportion of the disease burden among  
 212 exposed people that is caused by the exposure. We estimated AF from the logistic regression

213 models as suggested by Greenland and Drescher [28, 29]. In the analysis of baseline data where  
214 malaria was an exposure of interest, AF was the proportion of prevalent underweight, stunting, or  
215 thinness that could be attributed to the malaria infection.

## 216 **2.5.2 Linear mixed model**

217 In the analysis of longitudinal data, the intention-to-treat approach was implemented to evaluate  
218 the impact of anti-malarial treatment on nutritional status. Since the weight, height, and BMI  
219 measurements were repeated over time, the observations within each individual were assumed  
220 to be correlated. Such correlation violates the independence assumption of the classic linear  
221 model. To incorporate correlation within individuals and variation within and between children  
222 and schools, the linear mixed model was used in the analysis. The child identification number  
223 “child ID” and the “school “ were added as random effects to account for within-child variability  
224 due to repeated measurements and between-school variability. The correlation between children  
225 who live in the same households and variation between households was also interesting to study.  
226 However, we could not match children to their respective households and this could not be  
227 studied. This model formula was summarized in the following equation, which applies to all  
228 outcome parameters (weight, height, and BMI).

$$229 \quad Y_i = X_i\beta_i + Z_i b_i + \epsilon_i$$

230 Where;

$$231 \quad b_i \sim N(0, D)$$

232  $\epsilon_i \sim N(0, \sigma^2)$

233  $b_{1i}, \dots, b_{ni}, \epsilon_{1i}, \dots, \epsilon_{ni}$  are independent

234  $Y_i = n_i$ -dimensional vector for subject  $i$ ,  $1 \leq i \leq N$ , where  $N$  is the number of subjects

235  $X_i$  and  $Z_i$  are  $(n_i \times p)$  and  $(n_i \times q)$  dimensional matrices of known covariates.

236  $\beta$  is the  $p$ -dimensional vector containing the fixed effects

237  $b_i$  is the  $q$ -dimensional vector containing the random effects, and

238  $\epsilon_i$  is the  $n_i$ -dimensional vector containing residual components, and

239  $D$  is the general  $(q \times q)$  covariance matrix.

240 A study sample represents a population from which it was drawn; therefore, the  
241 distributional assumption was made for the random effects ( $b_i \sim N(0, D)$ ,  $\epsilon_i \sim N(0, \sigma^2)$ ) with  
242 the covariance matrix  $D$  assumed to be unstructured. Variance components of random effects  $b_i$   
243 (diagonal elements of matrix  $D$ ) measure the variability of longitudinal growth trajectories  
244 between individuals that are unexplained by covariates. The variability of repeated  
245 measurements within individual study participants was measured by the variance of residual  
246 component  $\epsilon_i$ .

247 In model building, we included the fixed effects of age, age as a quadratic term ( $\text{age}^2$ ), sex, the  
248 allocated treatment (study group), SES, and the interaction term of age-study group. The  
249 analysis model was decided by comparing the models with (in addition to fixed effects) random  
250 intercept and slope against models without random slope using the akaike information criterion  
251 (AIC). The model with random intercepts of "child id" and "school" had the lowest AIC value.  
252 The quadratic term of age was previously added due to the difference in growth rate that causes

253 a non-linear relationship between weight/height and age. The addition of quadratic term in the  
254 model introduced complexity in the interpretation. Its significance was further checked using  
255 AIC to compare a model with age and other covariates as described against the model with  
256 quadratic term included. The lower AIC was observed in the model that included a quadratic  
257 term of age. However, the difference was so small (see Appendix Table 12) that we ignored it  
258 and our final analysis model did not include a quadratic term. The estimates obtained from age-  
259 study group interaction were the effect sizes due to treatment over time. Assumptions for the  
260 linear model were checked by assessing the residual plots and mean of residuals, figures 8 and 9.  
261 The statistical inference employed in this analysis based on the restricted maximum likelihood  
262 method [30]. These analyses were carried out in R software version 4.2.1 for Windows, and the  
263 significance level was 0.05.

### 264 **2.5.3 Missing data management**

265 Overall data missingness was about 5% during the study. The reason for fewer data  
266 missingness was that visits were done on regular schooling days at the respective schools. The  
267 missing pattern affected individuals from two schools where scheduled visits were canceled as  
268 the government ordered sudden school closure due to covid-19 outbreak. Public activities were  
269 resumed within three months and the study visits continued accordingly. The reason for  
270 missingness did not relate to observed characteristics or the missing data; hence, missing data  
271 completely at random (MCAR) was considered the missing data mechanism. Considering the low  
272 rate of missingness and MCAR data missing mechanism, complete case analysis was applied.

## 273 **3 Results**

### 274 **3.1 General characteristics of the study population**

275 In February 2019, 2628 children aged 0-15 years were recruited from 958 households for  
276 socioeconomic and demographic assessment. The study focused on children of age 5-15 years;  
277 therefore, primary school children were a target source population. 1566 school-age children who  
278 met inclusion criteria and signed a consent form were clinically evaluated during the baseline  
279 phase of the study. Among them, 826 (53%) were male, and 740 (47%) were female children. The  
280 children's age ranged from 5 to 15 years, with the median age being 9 years. The weight and  
281 height of all children were measured during the baseline data collection, and their median values  
282 were 23Kgs and 128.5cm, respectively. The mean BMI was  $14.98(2.49)kg/m^2$ . 1566 children were  
283 further assigned to three treatment groups of two anti-malarial drugs and a standard care or  
284 control group. The balanced three study groups were Dihydroartemisinin-Piperaquine (DP)  
285 (n=526), Artesunate-Amodiaquine (ASAQ) (n=527), and Standard Care or control group (n=513).  
286 The average weight gains during the study period for the DP, ASAQ, and Standard Care treatment  
287 groups were 5kg, 5.1kg, and 5.2kg, respectively. For the children's height, the net gains were  
288 6cm, 6.1cm, and 6.5cm in the DP, ASAQ, and Standard Care treatment groups, respectively.

### 289 **3.2 Distribution of participants' characteristics and their nutritional outcomes**

290 The extreme categories of weight-for-age (severely underweight), height-for-age (severely  
291 stunted), BMI-for-age (severely thin), and obesity were in a very small (<5%) proportion in  
292 this study population. In this analysis, we used two categories, that is, WAZ <-2 (underweight)



293 and WAZ  $\geq -2$  (normal weight). 246 (23%) of 1064 children of age 5 to 10 years were either  
294 underweight or severely underweight. 327 (21%) of all study participants were stunted, and 439  
295 (28%) were either thin or severely thin. Among 1566 children, 806 (51%) belong to low SES  
296 households, 1352 (86%) heads of household (HH) acquired at least primary education, and  
297 216 (14%) did not attend school. Regarding infections, 403 (27%) of 1484 who were tested  
298 had malaria. 661 (42%) of all children reported a history of malaria in the past month, and 210  
299 (13%) used anti-malarial drugs in the previous week. When screened for other parasites, the  
300 prevalence of soil-transmitted helminths (STH) and schistosomiasis were 1% and 8%, respectively.  
301 Table 1 provides the summary of variables and their distribution proportions.

302 During the intervention, children's weight and height were measured at all visits, and malaria  
303 testing was done at baseline, after the first 12 months, and at the 20th month of study. Due to  
304 the absence of data for malaria at several scheduled visits, we only compared the point  
305 prevalence of nutritional indices and malaria at baseline and after 12 months. The point  
306 prevalence of malaria and nutritional status according to treatment allocation were summarized  
307 in Table 2 and Figure 2. Generally, malaria prevalence was notably low after 12 months of  
308 intervention in groups that received treatments compared to the standard care group. The  
309 underweight, stunted, and thin status among children did not largely vary from baseline to the  
310 12th-month visit.

311

Table 1: Baseline characteristics of study participants

312

| Predictor Variable                                   | Low WAZ        | Normal WAZ     | Low HAZ        | Normal HAZ      | Low BMI        | Normal BMI      |
|------------------------------------------------------|----------------|----------------|----------------|-----------------|----------------|-----------------|
|                                                      | n(%)           | n(%)           | n(%)           | n(%)            | n(%)           | n(%)            |
| <b>Total</b>                                         | <b>246(23)</b> | <b>818(77)</b> | <b>327(21)</b> | <b>1239(79)</b> | <b>439(28)</b> | <b>1127(72)</b> |
| <b>Gender</b>                                        |                |                |                |                 |                |                 |
| Male                                                 | 131 (24)       | 420 (76)       | 194 (23)       | 634 (77)        | 227 (52)       | 600 (53)        |
| Female                                               | 115 (22)       | 398 (78)       | 133 (18)       | 605 (82)        | 212 (48)       | 527 (47)        |
| <b>Socio-Economic Status</b>                         |                |                |                |                 |                |                 |
| Low                                                  | 143 (27)       | 392 (73)       | 180 (22)       | 625 (78)        | 233 (53)       | 554 (51)        |
| High                                                 | 103 (19)       | 426 (81)       | 147 (19)       | 614 (81)        | 206 (47)       | 573 (49)        |
| <b>Parents' Education Level</b>                      |                |                |                |                 |                |                 |
| None                                                 | 56 (26)        | 160 (74)       | 50 (23)        | 166 (77)        | 49 (23)        | 167 (77)        |
| Primary or above                                     | 374 (28)       | 978 (72)       | 277 (20)       | 1073 (80)       | 390 (29)       | 960 (71)        |
| <b>Infections</b>                                    |                |                |                |                 |                |                 |
| <b>Malaria</b>                                       |                |                |                |                 |                |                 |
| Yes                                                  | 61 (25)        | 187 (75)       | 113 (28)       | 290 (72)        | 105 (24)       | 298 (26)        |
| No                                                   | 175 (23)       | 590 (77)       | 190 (18)       | 891 (82)        | 318 (72)       | 763 (68)        |
| <b>Malaria for the past month</b>                    |                |                |                |                 |                |                 |
| Yes                                                  | 111 (25)       | 335 (75)       | 126 (19)       | 533 (81)        | 209 (48)       | 452 (40)        |
| No                                                   | 135 (22)       | 483 (78)       | 201 (22)       | 706 (78)        | 230 (52)       | 675 (60)        |
| <b>Anti-malaria for the past week</b>                |                |                |                |                 |                |                 |
| Yes                                                  | 38 (26)        | 108 (74)       | 38 (18)        | 170 (82)        | 62 (14)        | 146 (13)        |
| No                                                   | 208 (23)       | 710 (77)       | 289 (21)       | 1069 (79)       | 377 (86)       | 981 (87)        |
| <b>Soil-Transmitted Helminths (STH)</b>              |                |                |                |                 |                |                 |
| Yes                                                  | 3 (25)         | 9 (75)         | 4 (29)         | 12 (71)         | 3 (0.6)        | 13 (1)          |
| No                                                   | 239 (23)       | 791 (77)       | 316 (21)       | 1201 (79)       | 426 (97)       | 1091 (97)       |
| <b>Received STH medication for the past 6 months</b> |                |                |                |                 |                |                 |
| Yes                                                  | 120 (23)       | 406 (77)       | 205 (24)       | 663 (76)        | 222 (51)       | 646 (57)        |
| No                                                   | 126 (23)       | 412 (77)       | 122 (17)       | 576 (83)        | 217 (49)       | 481 (43)        |
| <b>Schistosomiasis</b>                               |                |                |                |                 |                |                 |
| Yes                                                  | 20 (23)        | 67 (77)        | 36 (27)        | 96 (73)         | 30 (7)         | 98 (9)          |

No 226 (23) 751 (77) 291 (20) 1143 (80) 396 (90) 1001 (89)

---

313

Table 2: Trend of malaria infections between study groups during follow-up visits

314

| Visit | Treatment     | Malaria (%) | Underweight | Stunted (%) | Thin (%) |
|-------|---------------|-------------|-------------|-------------|----------|
| 1     | DP            | 28.2        | 27.8        | 20.9        | 28.4     |
| 4     | DP            | 12          | 28.8        | 24.8        | 25.6     |
| 6     | DP            | 28          | 22.4        | 26.8        | 6.9      |
| 1     | ASAQ          | 24.7        | 29.5        | 21.3        | 30.9     |
| 4     | ASAQ          | 16.1        | 32.3        | 21.8        | 27.4     |
| 6     | ASAQ          | 27.4        | 24.7        | 29.4        | 7.6      |
| 1     | Standard Care | 28.7        | 26.2        | 13          | 26.2     |
| 4     | Standard Care | 33.3        | 21.9        | 13.2        | 25.4     |
| 6     | Standard Care | 28.2        | 20          | 23.7        | 6.3      |

315

---

DP= dihydroartemisinin-piperaquine, ASAQ=artesunate-amodiaquine

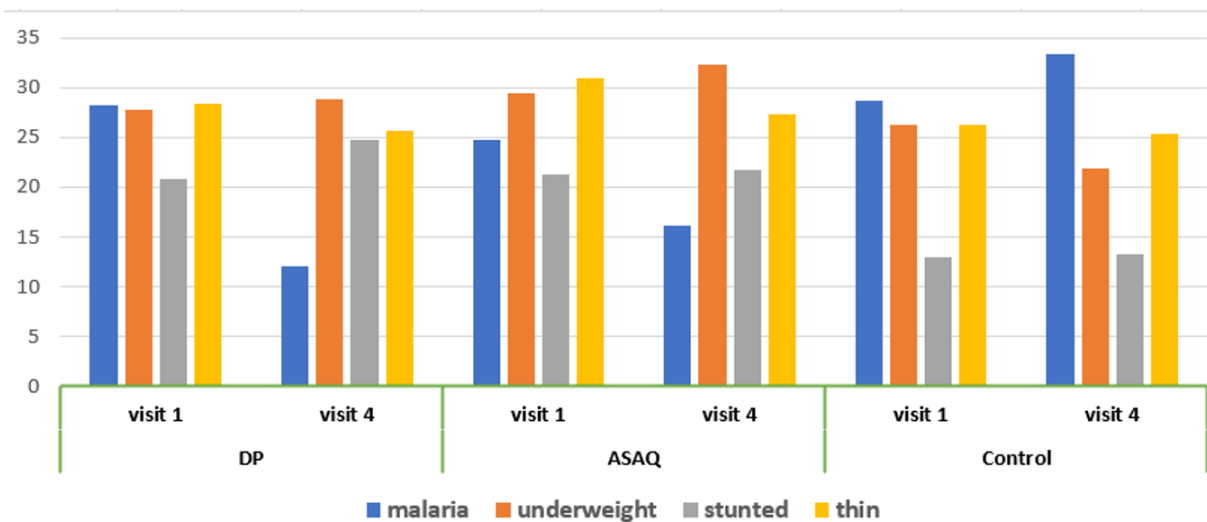

Figure 2: Trend of malaria and nutritional status before and after intervention

### 3.3 Malaria and Other Risk Factors of Malnutrition in School-age Children

#### 3.3.1 Malaria and other risk factors of being underweight (WAZ < -2) in school-age children

Among children diagnosed with malaria parasites, 61 (25%) of 248 were either underweight or severely underweight (Table 1). Table 2 summarizes the results of risk factors of being underweight from both univariable and multivariable logistic regression analysis. In univariable logistic regression, children from low SES households had 1.5 times higher odds (95% CI= [1.13, 2.01], P=0.005) of being underweight than the high SES category. The association between underweight status and low SES remained statistically significant even in the adjusted analysis (95% CI= [1.13, 2.01], P=0.006).

#### 3.3.2 Malaria and other risk factors of stunting (HAZ < -2) in school-age children

113 (28%) of all children with malaria were stunted (Table 1). In univariable logistic regression (Table 4), the odds of being stunted in the male sex were 1.4 times (OR=1.40, 95%

330 CI=[1.09, 1.79], P=0.008) higher compared to females. Children diagnosed with malaria had about  
 331 1.6 times higher odds of being stunted compared to those who did not have malaria (OR=1.55,  
 332 95% CI=[1.55, 1.88], P<0.001). When adjusted for “sex” in the multivariable logistic regression,  
 333 children with malaria infection had 78% higher odds (OR=1.78, 95% CI=[1.36, 2.33], P<0.001) of  
 334 stunting compared to those who did not have malaria. Malaria was attributed to stunting by  
 335 37% in this study population.

336 Table 3: Risk factors of being underweight (WAZ<-2) in a malaria endemic region among school-age children

| Variable <sup>a</sup>           |        | Crude OR | 95% CI     | p-value | Adjusted OR <sup>b</sup> | 95% CI     | p-value | ARP  |
|---------------------------------|--------|----------|------------|---------|--------------------------|------------|---------|------|
| Sex                             | Male   | 1.07     | 0.81, 1.43 | 0.622   |                          |            |         |      |
|                                 | Female | Ref      |            |         |                          |            |         |      |
| Socio-Economic Status           | Low    | 1.50     | 1.13, 2.01 | 0.005   | 1.50                     | 1.13, 2.01 | 0.006*  | 0.27 |
|                                 | High   | Ref      |            |         |                          |            |         |      |
| Number of people in a household |        | 1.0      | 0.93, 1.07 | 0.988   |                          |            |         |      |
| Head of HH attended school      | Yes    | 0.92     | 0.62, 1.40 | 0.699   |                          |            |         |      |
|                                 | No     | Ref      |            |         |                          |            |         |      |
| Malaria parasitemia             | Yes    | 0.99     | 0.76, 1.27 | 0.929   |                          |            |         |      |
|                                 | No     | Ref      |            |         |                          |            |         |      |
| Malaria in the past Month       | Yes    | 1.19     | 0.89, 1.59 | 0.235   | 1.20                     | 0.90, 1.59 | 0.226   |      |
|                                 | No     | Ref      |            |         |                          |            |         |      |
| Soil-Transmitted Helminths      | Yes    | 0.85     | 0.49, 1.34 | 0.497   |                          |            |         |      |
|                                 | No     | Ref      |            |         |                          |            |         |      |
| Schistosomiasis                 | Yes    | 1.00     | 0.70, 1.39 | 0.990   |                          |            |         |      |
|                                 | No     | Ref      |            |         |                          |            |         |      |

337 OR=Odds Ratio, CI=Confidence Interval, HH=Head of Household, Ref= Reference category, \* significant p-value, ARP=  
 338 Attributable Risk Proportion. <sup>a</sup>Variables were selected based on the previous literature and pre-analysis Directed-Acyclic Graphs  
 339 (DAGs) Figure 1. <sup>b</sup>Results are adjusted OR from the multivariable logistic regression model.

341 Table 4: Risk factors of stunting (HAZ<-2) in a malaria endemic region among school-age children

342

| Variable <sup>a</sup>           |        | Crude OR | 95% CI     | p-value | Adjusted OR <sup>b</sup> | 95% CI     | p-value | ARP  |
|---------------------------------|--------|----------|------------|---------|--------------------------|------------|---------|------|
| Sex                             | Male   | 1.40     | 1.09, 1.79 | 0.008   | 1.36                     | 1.06, 1.74 | 0.017*  | 0.23 |
|                                 | Female | Ref      |            |         |                          |            |         |      |
| Socio-Economic Status           | Low    | 1.20     | 0.94, 1.54 | 0.141   |                          |            |         |      |
|                                 | High   | Ref      |            |         |                          |            |         |      |
| Number of people in a household |        | 1.03     | 0.97, 1.09 | 0.289   |                          |            |         |      |
| Head of HH attended school      | Yes    | 0.86     | 0.61, 1.21 | 0.385   |                          |            |         |      |
|                                 | No     | Ref      |            |         |                          |            |         |      |
| Malaria parasitemia             | Yes    | 1.55     | 1.28, 1.88 | <0.001  | 1.78                     | 1.36, 2.33 | <0.001* | 0.37 |
|                                 | No     | Ref      |            |         |                          |            |         |      |
| Malaria in the past Month       | Yes    | 0.75     | 0.40, 1.34 | 0.134   |                          |            |         |      |
|                                 | No     | Ref      |            |         |                          |            |         |      |
| Soil-Transmitted Helminths      | Yes    | 1.04     | 0.68, 1.51 | 0.853   |                          |            |         |      |
|                                 | No     | Ref      |            |         |                          |            |         |      |
| Schistosomiasis                 | Yes    | 1.13     | 0.85, 1.49 | 0.396   |                          |            |         |      |
|                                 | No     | Ref      |            |         |                          |            |         |      |

343 OR=Odds Ratio, CI=Confidence Interval, HH=Head of Household, Ref= Reference category, \* significant p-value,

344 ARP= Attributable Risk Proportion. <sup>a</sup>Variables were selected based on the previous literature and pre-analysis Directed-Acyclic

345 Graphs(DAGs) Figure 1. <sup>b</sup>Results are adjusted OR from the multivariable logistic regression model.

346 **3.3.3 Malaria and other risk factors of being thin (ZBMI< -2) in school-age children**

347 Among 403 children who had malaria, 105 (26%) were thin as they were in a category of less than  
 348 negative 2 BMI Z-score (Table 1). The effect sizes for the association between thinness and the  
 349 risk factors are provided in Table 5. The results of univariable logistic regression showed that the  
 350 odds of being thin were 36% higher (OR=1.36, 95% CI=[1.09, 1.70], P<0.001) in children who  
 351 reported a history of malaria illness in the past month. In the adjusted analysis, the  
 352 association between history of malaria infection and thinness remained significant (AOR=1.37,  
 353 95% CI=[1.10, 1.71], P=0.006). The association between head of household education level and  
 354 thinness in children was not significant in both univariable and multivariable logistic regression.

355 Table 5: Risk factors of being thin (ZBMI< -2) in a malaria endemic region among school-age  
 356 children

| Variable <sup>a</sup>           |        | Crude OR | 95% CI     | p-value | Adjusted OR <sup>b</sup> | 95% CI     | p-value | ARP  |
|---------------------------------|--------|----------|------------|---------|--------------------------|------------|---------|------|
| Sex                             | Male   | 0.94     | 0.75, 1.17 | 0.593   |                          |            |         |      |
|                                 | Female | Ref      |            |         |                          |            |         |      |
| Socio-Economic Status           | Low    | 1.10     | 0.88, 1.37 | 0.414   |                          |            |         |      |
|                                 | High   | Ref      |            |         |                          |            |         |      |
| Number of people in a household |        | 0.99     | 0.93, 1.04 | 0.597   |                          |            |         |      |
| Head of HH attended school      | Yes    | 1.39     | 0.99, 1.96 | 0.062   | 1.40                     | 1.00, 1.99 | 0.052   |      |
|                                 | No     | Ref      |            |         |                          |            |         |      |
| Malaria parasitemia             | Yes    | 0.80     | 0.65, 0.97 | 0.205   |                          |            |         |      |
|                                 | No     | Ref      |            |         |                          |            |         |      |
| Malaria in the past Month       | Yes    | 1.36     | 1.09, 1.70 | <0.001  | 1.37                     | 1.10, 1.71 | 0.006*  | 0.20 |
|                                 | No     | Ref      |            |         |                          |            |         |      |
| Soil-Transmitted Helminths      | Yes    | 1.00     | 0.68, 1.42 | 0.999   |                          |            |         |      |
|                                 | No     | Ref      |            |         |                          |            |         |      |

|                 |     |      |            |       |
|-----------------|-----|------|------------|-------|
| Schistosomiasis | Yes | 0.94 | 0.17, 1.22 | 0.641 |
|                 | No  | Ref  |            |       |

OR=Odds Ratio, CI=Confidence Interval, HH=Head of Household, Ref= Reference category, \* significant p-value, ARP=

Attributable Risk Proportion. <sup>a</sup>Variables were selected based on the previous literature and pre-analysis Directed-Acyclic Graphs

(DAGs) Figure 1. <sup>b</sup>Results are adjusted OR from the multivariable logistic regression model.

### 3.4 The trend of weight, height, and body mass index (BMI) during and after the trial

#### 3.4.1 The average trend of children's height, weight, and BMI

The children's weight, height, and BMI were measured prior to starting the 12 months intervention. It was thereafter measured during each follow-up visit, including the eight months post-trial. Figure 3 shows the evolution of mean height predicted from the linear mixed model across age. Overall, the children's height increased almost linearly with increasing age. Visually, there is no significant difference in the trend of average height for age between the study groups. Due to similarities between children randomized to different treatment groups, their mean height data points overlap, markedly in the 5 to 10 years age group. The plots for the weight (Figure 6), BMI (Figure 7), and the trend of height-for-age grouped by sex (Figure 5) are available in the appendix.



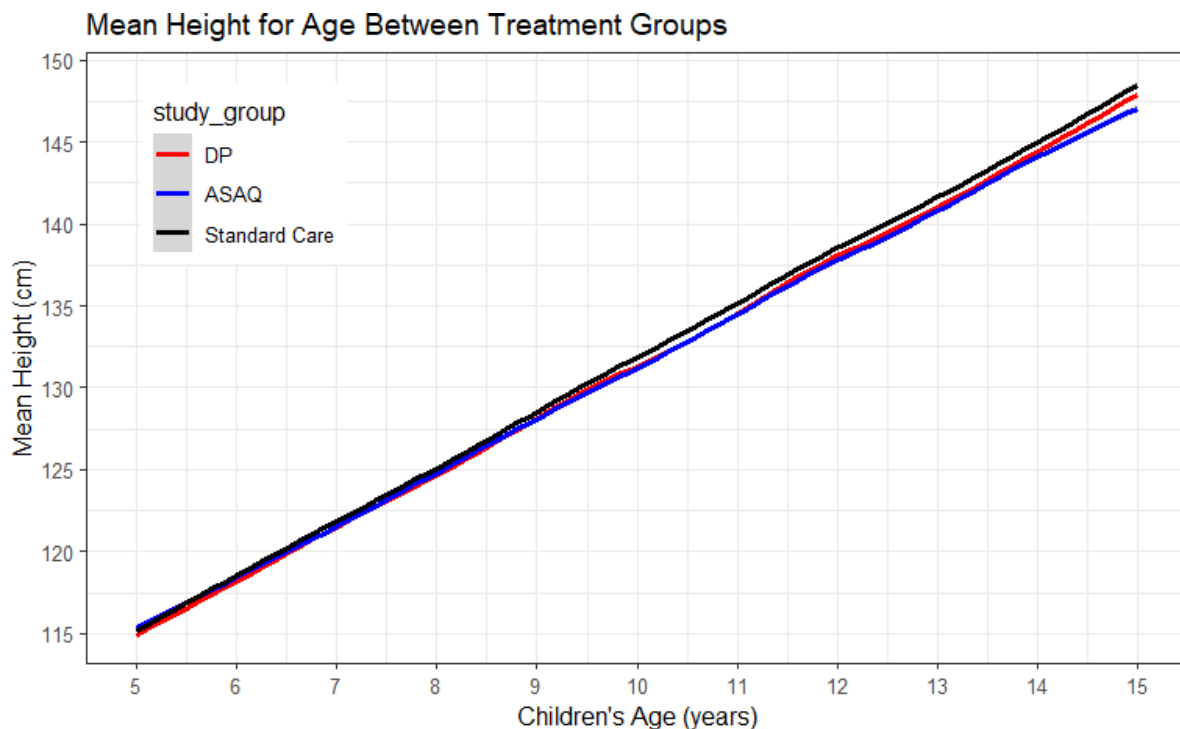

372

373

Figure 3: The trend of mean height-for-age of school-age children grouped by treatment

374

375

### 3.4.2 The individual profile for the children's height, weight, and BMI

376

Change in children's height, weight, and BMI at the individual level was explored using profile plots. A

377

random sample of 70 children was drawn and their individual plots were plotted in Figure 4. The plots

378

showed minimum data imbalance as there was not much noticeable discontinuation of individual lines at

379

subsequent data points, which signifies minimum missingness in the data. Following individual profile

380

lines, the data points of many subjects inconsistently change from lower to higher values and vice versa.

381

Such a pattern of changes signifies high within-child variability among individuals as their height,

382

weight, and BMI evolved with time. High variability between children was also seen in plots a, b, and c.

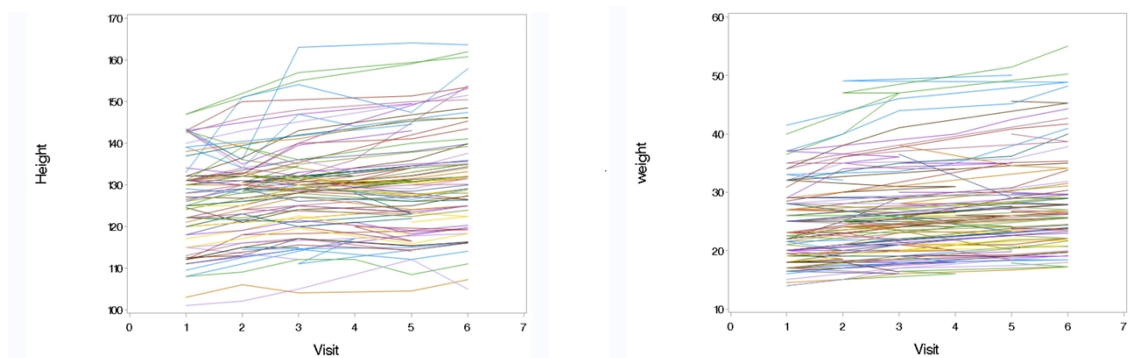

383

384

(a) Height

(b) Weight

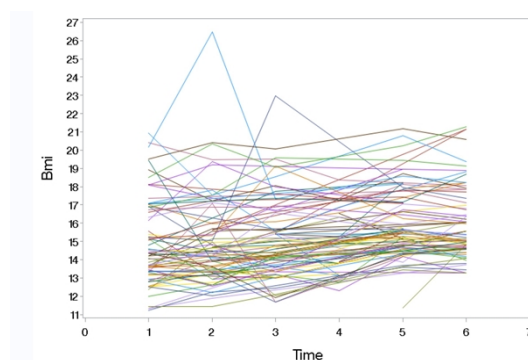

385

386

(c) bmi

387

Figure 4: Individual profile plots for 70 randomly selected children

388

### 3.4.3 The impact of malaria intermittent preventive therapy on weight, height, and BMI

389

The impact of malaria preventive treatment on growth indices was investigated using the linear

390

mixed model (LMM). Different models with and without random effects were compared using

391

AIC and the results are presented in Appendix Table 13. The model with a “child ID” and

392

“school” as random intercept had the smallest AIC, and was therefore selected as the final

393

model.

394 Our analysis that investigated random effects of individual "child id" and "school" revealed that  
395 between-children and within-child variability were high, whereas between-schools variability was  
396 minimal for all growth indices. Quantitatively, the between-children (child id) variance (Tables 6,  
397 7, and 8) were 18.06 (81%), 25.95 (61.4%), and 9.82 (26.4%) for weight, height, and BMI,  
398 respectively. The between-schools variance was less than 1% for weight, height, and BMI.  
399 Repeated measurements for each study participant also explained a large portion of variance  
400 as estimated by the residual component of the LMM. The within-child variance in weight,  
401 height, and BMI were 4.1 (18.4%), 16.07 (38%), and 27.2 (73.2%), respectively. The proportions  
402 described here are relevant to the individual profile plots described in the previous section 3.4.2.  
403 The effect of malaria preventive therapy (tables 6, 7, and 8) on weight, height, and BMI was  
404 evaluated by including the treatment allocation as a fixed effect covariate (that provided the  
405 estimates for comparison at baseline), and the interaction term of treatment allocation and age  
406 (that provided estimates of changing slope over time). At baseline, the treatment was not  
407 consumed by the participants; therefore, the latter reflects the true treatment effect that was  
408 studied. Adjusted for other covariates in the model, the means of weight, height, and BMI in DP  
409 and ASAQ treatment groups were not significantly different from that of the control group at  
410 baseline. During the intervention, change in mean weight, height, and BMI over time as estimated  
411 from age-study group interaction was not significantly different in DP and ASAQ groups compared  
412 to the control group. A unit change in age increased weight, height, and BMI by 2.2 units (p-  
413 value  
414 <0.001), 3.3 units (p-value <0.001), and 0.5 units (p-value <0.001). The height and weight in  
415 female children were higher compared to that of male children by 1 unit (p-value <0.001) and

416 0.8 unit (p-value  
417 <0.001), respectively. Compared to males, being female did not significantly affect the BMI in our  
418 study. The change in weight, height, and BMI was not significantly different in children from low  
419 SES households compared to the high SES category.  
420 When children were followed for 8 months after the intervention, there was no significant  
421 difference in weight, height, or BMI based on their former treatment allocation. The finding is  
422 intuitively reasonable because there was no actual treatment given to the participants. However,  
423 the effect of age on the growth parameters remained statistically significant even when  
424 treatments were stopped.

425 Table 6: LMM results for weight during the trial  
426

| Random effects       |  | Variance |  |  |  |
|----------------------|--|----------|--|--|--|
| Child id (intercept) |  | 18.0647  |  |  |  |
| School (intercept)   |  | 0.1230   |  |  |  |
| Residual             |  | 4.1008   |  |  |  |

  

| Fixed effect               | estimate | sd      | df   | t value | p value |
|----------------------------|----------|---------|------|---------|---------|
| Intercept                  | 5.4418   | 0.7495  | 945  | 7.26    | <.0001* |
| age                        | 2.1758   | 0.07676 | 1563 | 28.34   | <.0001* |
| sex: female                | 0.7867   | 0.2248  | 1558 | 3.50    | 0.0005* |
| sex: male                  | Ref      |         |      |         |         |
| study_group: DP            | -1.4332  | 1.0137  | 1562 | -1.41   | 0.1576  |
| study_group: ASAQ          | -0.2494  | 1.0272  | 1564 | -0.24   | 0.8082  |
| study_group: standard care | Ref      |         |      |         |         |

|                   |          |        |      |      |        |
|-------------------|----------|--------|------|------|--------|
| ses: high         | 0.2704   | 0.2240 | 1559 | 1.21 | 0.2277 |
| ses: low          | Ref      |        |      |      |        |
| age*DP            | 0.1250   | 0.1072 | 1559 | 1.17 | 0.2438 |
| age*ASAQ          | 0.002238 | 0.1082 | 1561 | 0.02 | 0.9835 |
| <hr/>             |          |        |      |      |        |
| age*standard care | Ref      |        |      |      |        |

427 DP= Dihydroartemisinin-Piperaquine, ASAQ=Artesunate-Amodiaquine, BMI=Body Mass Index, \*significant p-value, SES=  
428 Socio-Economic Status, Ref= Reference category.

Table 7: LMM results for height during trial

429

| Random effects             |          | Variance |      |         |         |
|----------------------------|----------|----------|------|---------|---------|
| Child id (intercept)       |          | 25.9479  |      |         |         |
| School (intercept)         |          | 0.2607   |      |         |         |
| Residual                   |          | 16.0669  |      |         |         |
| Fixed effect               | estimate | sd       | df   | t value | p-value |
| Intercept                  | 97.8322  | 0.9579   | 743  | 102.13  | <.0001* |
| age                        | 3.3255   | 0.09759  | 1546 | 34.08   | <.0001* |
| sex: female                | 1.0031   | 0.2855   | 1536 | 3.51    | 0.0005* |
| sex: male                  | Ref      |          |      |         |         |
| study_group: DP            | -0.2338  | 1.2890   | 1545 | -0.18   | 0.8561  |
| study_group: ASAQ          | 0.2858   | 1.3068   | 1549 | 0.22    | 0.8269  |
| study_group: standard care | Ref      |          |      |         |         |
| ses: high                  | 0.5509   | 0.2846   | 1537 | 1.94    | 0.0531  |
| ses: low                   | Ref      |          |      |         |         |
| age*DP                     | -0.02532 | 0.1363   | 1540 | -0.19   | 0.8526  |

age\*ASAQ -0.08752 0.1376 1543 -0.64 0.5247

---

age\*standard care Ref

430 DP= Dihydroartemisinin-Piperaquine, ASAQ=Artesunate-Amodiaquine, BMI=Body Mass Index, \*significant p-value, SES=

431 Socio-Economic Status, Ref= Reference category.

432  
433  
434 Table 8: LMM results for BMI during trial

435

| Random effects             |          | Variance |     |         |         |
|----------------------------|----------|----------|-----|---------|---------|
| Child id (intercept)       |          | 9.8184   |     |         |         |
| School (intercept)         |          | 0.1198   |     |         |         |
| Residual                   |          | 27.2050  |     |         |         |
| Fixed effects              | estimate | sd       | df  | t value | p-value |
| Intercept                  | 10.7147  | 0.7420   | 654 | 14.44   | <.0001* |
| age                        | 0.5034   | 0.07588  | 968 | 6.63    | <.0001* |
| sex: female                | -0.02875 | 0.2214   | 949 | -0.13   | 0.8967  |
| sex: male                  | Ref      |          |     |         |         |
| study_group: DP            | -0.7717  | 1.0023   | 965 | -0.77   | 0.4415  |
| study_group: ASAQ          | 0.9352   | 1.0174   | 970 | 0.92    | 0.3582  |
| study_group: standard care | Ref      |          |     |         |         |
| ses: high                  | -0.08942 | 0.2208   | 952 | -0.41   | 0.6855  |
| ses: low                   | Ref      |          |     |         |         |
| age*DP                     | 0.07478  | 0.1058   | 956 | 0.71    | 0.4799  |
| age*ASAQ                   | -0.07621 | 0.1069   | 962 | -0.71   | 0.4762  |

---

age\*standard care

Ref

436

DP= Dihydroartemisinin-Piperaquine, ASAQ=Artesunate-Amodiaquine, BMI=Body Mass Index, \*significant p-value, SES=

437

Socio-Economic Status, Ref= Reference category.

## 438 **4 Discussion**

439 Both malaria and malnutrition in children impose a burden of public health importance in LMIC  
440 in tropical regions. From the baseline data of our study, we found a malaria prevalence of 27%.  
441 42% of children reported a history of malaria, and 13% used anti-malaria drugs in the past week.  
442 The prevalence of other parasitic infections, soil-transmitted helminths (STH), and  
443 schistosomiasis were 1% and 8%, respectively. For the nutritional status, 23% of 5-10 years old  
444 children were underweight (WAZ<-2), 21% of all children were stunted (HAZ<-2), and 28% were  
445 thin (ZBMI <-2). Most studies on malaria and malnutrition were conducted in children aged years  
446 and below, and one-third of children had at least one form of malnutrition in Tanzania [31]. In  
447 Nepal, 25.7% of adolescents were malnourished, and 21.8% were underweight [32]. A study  
448 conducted in Nigeria found malnutrition prevalence of 22% underweight, 37% stunting, and 6.9%  
449 wasted [33].

450 Among children diagnosed with malaria, 25% of 5-10 years old children were underweight,  
451 and 28% of all children with malaria were stunted. While the malaria-malnutrition interaction  
452 has been observed in disease-endemic regions, it is difficult to establish which precedes the  
453 other [13]. In our study, we hypothesized that malaria infection (prolonged asymptomatic  
454 parasitemia in the malaria endemic region) poses a risk for malnutrition in children. However,  
455 most malaria-malnutrition studies investigated this phenomenon in children of age five years and  
456 below, with a perspective that malnutrition is the underlying risk for malaria since poor nutritional  
457 status leads to weak immunity [14, 34]. Malaria was significantly associated with stunting in our



458 study. This finding is consistent with similar studies conducted in  $\leq 5$  years children that  
459 showed a significant association between malaria and being stunted. A cohort study that  
460 included a wide range of age (1 month to 14 years) in the Brazilian Amazon reported that  
461 multiple malaria episodes significantly negatively affected the linear growth of children of age 5  
462 to 10 years [16]. Other observational studies from Sub-Saharan Africa in  $\leq 5$  years children  
463 reported a significant association [15, 35]. Stunting is a chronic condition that develops when an  
464 individual is exposed over a reasonably long time. Given that our data were cross-sectionally  
465 collected, the significant association between malaria infection diagnosed at one-time  
466 measurement is not biologically plausible. The finding rather reflects that children with recent  
467 malaria infection had previous recurrent infections since this study area is a stable malaria  
468 endemic region. During their life cycle, *Plasmodium falciparum* cause destruction of red blood  
469 cells leading to anemia. The subclinical hypoxic condition due to anemia inhibits insulin-growth  
470 factor-I, the hormone that plays a vital role in growth [36]. Such slowed growth experience  
471 predisposes children to long-term consequences of poor height gain depending on the level and  
472 duration of exposure.

473 We found an association between male sex and stunting as shown by higher odds and a p-value  
474 lower than 5% significance level. The finding aligns with previous studies from children under five  
475 that the male sex was associated with at least one form of malnutrition [37, 38, 39]. We  
476 identified that children from low socio-economic status (SES) households had a statistically  
477 significant higher odds of being underweight. Prior studies also showed a significant association

478 between low SES and underweight [31, 33]. Unlike underweight, stunting had no significant  
479 association with low SES [32, 33]. This insignificance implies that there could be factors that  
480 determine nutritional status in older children (school-age) that were not  
481 explored in the scope of this study, given that it was primarily designed for other purposes.  
482 Further nutritional studies need to investigate factors related to the life of a school-age child and  
483 adolescents as described by Scaglioni et al. in 2018 [40]; for example, distance from home to  
484 school, availability of food in a school setting, amount of food, meal frequency, and daily  
485 activities other than studies. Using a qualitative design that enrolls parents, teachers, and school  
486 children would be more informative.

487 Overall, an increase in weight and height in all participants was expected since age (a time factor)  
488 and sex are known to have a great influence on children's growth. In our analysis using a linear  
489 mixed model, the effect estimates of DP and ASAQ on weight, height, and BMI were small and  
490 not statistically significant. Previous trials using anti-malarial drugs aimed at the effect of  
491 treatment in minimizing parasitemia, improvement of hemoglobin levels, and cognitive  
492 performance [4, 5, 19, 20]. The impact of treatment on nutritional status was reported rarely.  
493 Interventional studies that included infants and preschool children were conducted in Kenya  
494 [1997] and Senegal (2011), and they reported significant weight gain in treatment groups  
495 compared with the control group [41, 42]. The previous studies that reported significant weight  
496 and height gains in treatment groups included preschool children whose diet content and eating  
497 behaviors differ from the age group we studied. Energy requirements for children aged five and

498 above are high, especially for children who live in low SES settings [43]. In that context, the  
499 difference in age-appropriate energy requirements, environment, and daily activities might have  
500 influenced the results.

501 Our study had several strengths; First, the use of both cross-sectional and longitudinal designs  
502 allowed assessment of risk factors and malaria-malnutrition burden. Knowing the prevalence of  
503 malaria at baseline set the ground for the significance of doing the trial using anti-malarial drugs.  
504 The longitudinal design was useful for studying causal relationships. Secondly, to the best of our  
505 knowledge, this is among the few interventions to report the impact of intermittent preventive  
506 therapy for malaria on the nutritional status. This makes it a valuable knowledge source in  
507 addition to similar studies that included preschool children. The study does have some  
508 limitations. Firstly, we analyzed data that was primarily collected not for the purpose of  
509 nutritional assessment. For that reason, some known risk factors for malnutrition were not  
510 collected and, therefore, unavailable for analysis. In addition to known risks, it was important to  
511 assess other factors relevant to older children and adolescents, as it was shown in the Directed  
512 Acyclic Graphs (DAGs), Figure 1. Secondly, a wide range of available literature on the risks of  
513 malnutrition based on findings from under five years children who were extensively studied  
514 previously. This limits the comparability of information while discussing the findings of our study.  
515 Thirdly, the children in grades 6 and 7 were excluded from the study for practical reasons that  
516 they were anticipated to complete their school curriculum before the intervention study ended.  
517 The exclusion of older children limits the generalizability of results to the population of older

518 children and adolescents. Another limitation was that, despite a significant association between  
519 malaria infection and stunting in our study, the conclusion on this causal effect is biologically  
520 incorrect because the parasitemia detected was measured only once at baseline. Restriction in  
521 height gain due to malaria infection can only be concluded given the exposure is stable for a  
522 considerably long time. Alternatively, this phenomenon could be investigated from a cohort  
523 design that takes into account the frequency of infections encountered by individual children.  
524 Lastly, we could not identify children who lived in the same household; therefore, clustering  
525 between households and variability between children from the same households could not be  
526 addressed in the analysis as a random effect.

## 527 **5 Conclusion**

528 The double health burden of malaria and malnutrition exists in almost equal proportion in the  
529 setting where we conducted the study. Factors known to be risks for malnutrition (low SES and  
530 Head of household education level) in under five years children were not significant in children  
531 aged  $\geq 10$  years. Further studies need to evaluate other factors relevant to the age group. For  
532 example, distance from home to school, availability of food in a school setting, amount of food,  
533 meal frequency, and daily activities other than studies. Using a qualitative design that enrolls  
534 parents, teachers, and school children would be more informative. The use of anti-malarial drugs  
535 for prevention purpose does not necessarily improve nutritional status. Combined with the  
536 previous findings suggestive of no established causal association between malaria infection and

537 malnutrition, public health interventions need an integrated approach to address the two co-  
538 existing problems. Intuitively, malnutrition cannot be treated using anti-malarial drugs, and good  
539 nutritional status does not prevent malaria infection. The latter improves immunity to better  
540 fight infections, including malaria. Therefore, both malaria control and nutrition improvement  
541 programs should be implemented to achieve the intended health effect. The majority of the  
542 community members are peasants who produce food products for their families. Public health  
543 agencies should reinforce nutritional programs by collaborating with local communities to ensure  
544 food availability in schools and sustainable nutritional education to the local community  
545 members.

## 546 **Acknowledgement**

547 I would like to express my sincere gratitude to the promotor of this study Prof. Jean-Pierre Van  
548 geertruyden, and Geoffrey Makenga for their continued support throughout the development  
549 of this report. I would also like to thank Prof. Steven Abrams and Jackline Mbishi for their  
550 assistance in statistical analysis. In a special way, I am grateful to the VLIROUS scholarship for  
551 providing financial support for this master's program. These thanks are extended to the  
552 parties that helped in the acquisition of the data as mentioned in the other article [6]; the  
553 Muheza District officials; the District Medical Officer, district school health and NTD  
554 coordinators, schoolteachers, parents and guardians of children and the participants for their  
555 collaboration and support in the conduct of the study. Authors acknowledge stakeholders for  
556 school health program: The Ministry of Health, (MoH); the Ministry of Education, Science and

557 Technology; the President's Office- Regional Administration and Local Government (PO-  
558 RALG); the National Malaria Control Programme (NMCP) and the National Neglected Tropical  
559 Diseases (NTD) program for their cordial inputs with regard to study implementation and  
560 policy. The NIMR Director General and his staff for coordination of the study team and  
561 external stakeholders to the school health program. NIMR Tanga center staff for their cordial  
562 support during the preparation and implementation of the study. Global Health Institute  
563 staff (Universiteit Antwerpen, Belgium) for their administrative and logistical support.

## 564 **Funding**

565 There was no financial support received from any funding agent for this particular manuscript.  
566 The parent study was funded by the Flemish Interuniversity Council (VLIRUOS), Belgium,  
567 TEAM initiative, grant number, TZ2017TEA451A102.

## 568 **Competing Interests**

569 We declare no competing interest regarding this piece of work.

## 570 **Data availability and sharing**

571 The de-identified data will be available upon request. The approval for accessibility will be  
572 granted by the National Institute for Medical Research, Tanzania. This will involve signing data  
573 transfer agreement.

574 **References**

- 575 [1] WHO. World Malaria report; 2017. [http://apps.who.int/iris/bitstream/handle/10665/](http://apps.who.int/iris/bitstream/handle/10665/259492/9789241565523-eng.pdf;jsessionid=7E8CAE9253ECC329D50148B96CC80DAF?sequence=1)  
576 [259492/9789241565523-eng.pdf;jsessionid=7E8CAE9253ECC329D50148B96CC80DAF?sequence= 1.](http://apps.who.int/iris/bitstream/handle/10665/259492/9789241565523-eng.pdf;jsessionid=7E8CAE9253ECC329D50148B96CC80DAF?sequence=1)
- 577 [2] WHO. World malaria report; 2020. [https://www.who.int/publications/i/item/9789240015791.](https://www.who.int/publications/i/item/9789240015791)
- 578 [3] WHO. World malaria report; 2021. [https://www.who.int/teams/global-malaria-programme/](https://www.who.int/teams/global-malaria-programme/reports/world-malaria-report-2021#:~:text=According%20to%20WHO's%20latest%20World,)  
579 [reports/world-malaria-report-2021#:~:text=According%20to%20WHO's%20latest%20World,](https://www.who.int/teams/global-malaria-programme/reports/world-malaria-report-2021#:~:text=According%20to%20WHO's%20latest%20World,)  
580 [and%2069%20000%20more%20deaths.](https://www.who.int/teams/global-malaria-programme/reports/world-malaria-report-2021#:~:text=According%20to%20WHO's%20latest%20World,)
- 581 [4] Nankabirwa JI, Wandera B, Amuge P, Kiwanuka N, Dorsey G, Rosenthal PJ, et al. Impact of  
582 intermittent preventive treatment with dihydroartemisinin-piperazine on malaria in Ugandan  
583 schoolchildren: a randomized, placebo-controlled trial. *Clinical Infectious Diseases*.  
584 2014;58(10):1404-12.
- 585 [5] Mtove G, Mugasa JP, Messenger LA, Malima RC, Mangesho P, Magogo F, et al. The effectiveness  
586 of non-pyrethroid insecticide-treated durable wall lining to control malaria in rural Tanzania: study  
587 protocol for a two-armed cluster randomized trial. *BMC public health*. 2016;16(1):1-15.
- 588 [6] Makenga G, Baraka V, Francis F, Minja DT, Gesase S, Kyaruzi E, et al. Attributable risk factors for  
589 asymptomatic malaria and anaemia and their association with cognitive and psychomotor functions  
590 in schoolchildren of north-eastern Tanzania. *Plos one*. 2022;17(5):e0268654.
- 591 [7] Elia M. Defining, recognizing, and reporting malnutrition. *The international journal of lower extremity*  
592 *wounds*. 2017;16(4):230-7.
- 593 [8] Christian P, Smith ER. Adolescent undernutrition: global burden, physiology, and nutritional risks.

594 Annals of Nutrition and Metabolism. 2018;72(4):316-28.

595 [9] UNICEF. World malaria report; 2019.

596 <https://data.unicef.org/resources/state-of-the-worlds-children-2019/>.

597 [10] Abarca-Gomez L, Abdeen ZA, Hamid ZA, Abu-Rmeileh NM, Acosta-Cazares B, Acuin C, et al.

598 Worldwide trends in body-mass index, underweight, overweight, and obesity from 1975 to 2016: a

599 pooled analysis of 2416 population-based measurement studies in 128· 9 million children, adolescents,

600 and adults. The lancet. 2017;390(10113):2627-42.

601 [11] Mnkugwe RH, Minzi OS, Kinung'hi SM, Kamuhabwa AA, Aklillu E. Prevalence and correlates of

602 intestinal schistosomiasis infection among school-aged children in North-Western Tanzania. PloS one.

603 2020;15(2):e0228770.

604 [12] Ministry of Health CD, Gender, Elderly and Children (MoHCDGEC) [Tanzania Mainland], Ministry

605 of Health (MoH) [Zanzibar], Tanzania Food and Nutrition Centre (TFNC), National Bureau of Statis-

606 tics (NBS), Office of the Chief Government Statistician (OCGS) [Zanzibar] and UNICEF. Tanzania



- 607 National Nutrition Survey using SMART Methodology (TNNS); 2019. [https://www.usaid.gov/](https://www.usaid.gov/sites/default/files/documents/Copy_of_tagged_Tanzania-Nutrition-Profile.pdf)  
608 [sites/default/files/documents/Copy\\_of\\_tagged\\_Tanzania-Nutrition-Profile.pdf](https://www.usaid.gov/sites/default/files/documents/Copy_of_tagged_Tanzania-Nutrition-Profile.pdf).
- 609 [13] Das D, Grais R, Okiro E, Stepniewska K, Mansoor R, Van Der Kam S, et al. Complex interactions  
610 between malaria and malnutrition: a systematic literature review. *BMC medicine*. 2018;16(1):1-14.
- 611 [14] Katona P, Katona-Apte J. The interaction between nutrition and infection. *Clinical Infectious*  
612 *Diseases*. 2008;46(10):1582-8.
- 613 [15] Sakwe N, Bigoga J, Ngondi J, Njeambosay B, Esemu L, Kouambeng C, et al. Relationship between  
614 malaria, anaemia, nutritional and socio-economic status amongst under-ten children, in the North  
615 Region of Cameroon: A cross-sectional assessment. *Plos one*. 2019;14(6):e0218442.
- 616 [16] Alexandre MAA, Benzecry SG, Siqueira AM, Vitor-Silva S, Melo GC, Monteiro WM, et al. The asso-  
617 ciation between nutritional status and malaria in children from a rural community in the Amazonian  
618 region: a longitudinal study. *PLoS neglected tropical diseases*. 2015;9(4):e0003743.
- 619 [17] Wilson AL, Bradley J, Kandeh B, Salami K, D'Alessandro U, Pinder M, et al. Is chronic malnutrition  
620 associated with an increase in malaria incidence? A cohort study in children aged under 5 years in  
621 rural Gambia. *Parasites & vectors*. 2018;11(1):1-11.
- 622 [18] WHO. World malaria report; 2018. [http://apps.who.int/iris/bitstream/handle/10665/](http://apps.who.int/iris/bitstream/handle/10665/275867/9789241565653-eng.pdf)  
623 [275867/9789241565653-eng.pdf](http://apps.who.int/iris/bitstream/handle/10665/275867/9789241565653-eng.pdf).
- 624 [19] Clarke SE, Rouhani S, Diarra S, Saye R, Bamadio M, Jones R, et al. Impact of a malaria intervention  
625 package in schools on Plasmodium infection, anaemia and cognitive function in schoolchildren in Mali:  
626 a pragmatic cluster-randomised trial. *BMJ global health*. 2017;2(2):e000182.

- 627 [20] Ter Kuile FO, Terlouw DJ, Phillips-Howard PA, Hawley WA, Friedman JF, Kolczak MS, et al. Impact  
628 of permethrin-treated bed nets on malaria and all-cause morbidity in young children in an area of  
629 intense perennial malaria transmission in western Kenya: cross-sectional survey. *The American*  
630 *journal of tropical medicine and hygiene*. 2003;68(4 suppl):100-7.
- 631 [21] Oldenburg CE, Guerin PJ, Berthé F, Grais RF, Isanaka S. Malaria and nutritional status among  
632 children with severe acute malnutrition in Niger: a prospective cohort study. *Clinical Infectious*  
633 *Diseases*. 2018;67(7):1027-34.
- 634 [22] Makenga G, Baraka V, Francis F, Nakato S, Gesase S, Mtove G, et al. Effectiveness and safety of  
635 intermittent preventive treatment for malaria using either dihydroartemisinin-piperazine or  
636 artesunate- amodiaquine in reducing malaria related morbidities and improving cognitive ability in  
637 school-aged children in Tanzania: A study protocol for a controlled randomised trial. *Contemporary*  
638 *Clinical Trials Communications*. 2020;17:100546.
- 639 [23] NATIONAL INSTITUTE OF MALARIA RESEARCH NEW DELHI. Guidelines for Diagnosis and  
640 Treatment of Malaria in India; 2018. [https://nvbdcp.gov.in/WriteReadData/l892s/  
641 20627628441542176662.pdf](https://nvbdcp.gov.in/WriteReadData/l892s/20627628441542176662.pdf), Last accessed on 2022-07-12.
- 642 [24] Baron IS. Test of everyday attention for children; the thames valley test company, bury st. Edmunds,  
643 suffolk, UK. *Child Neuropsychology*. 2001;7(3):190-5.
- 644 [25] Khairnar K, Martin D, Lau R, Ralevski F, Pillai DR. Multiplex real-time quantitative PCR, mi-  
645 croscopy and rapid diagnostic immuno-chromatographic tests for the detection of *Plasmodium* spp:  
646 performance, limit of detection analysis and quality assurance. *Malaria journal*. 2009;8(1):1-17.
- 647 [26] De Onis M. World Health Organization Reference Curves. The ECOG's eBook on Child and

648 Adolescent Obesity. 2015:19.

649 [27] Bursac Z, Gauss CH, Williams DK, Hosmer DW. Purposeful selection of variables in logistic  
650 regression. *Source code for biology and medicine*. 2008;3(1):1-8.

651 [28] Greenland S, Drescher K. Maximum likelihood estimation of the attributable fraction from logistic  
652 models. *Biometrics*. 1993:865-72.

653 [29] Rückinger S, von Kries R, Toschke AM. An illustration of and programs estimating attributable  
654 fractions in large scale surveys considering multiple risk factors. *BMC medical research methodology*.  
655 2009;9(1):1-6.

656 [30] Lindstrom MJ, Bates DM. Newton—Raphson and EM algorithms for linear mixed-effects models for  
657 repeated-measures data. *Journal of the American Statistical Association*. 1988;83(404):1014-22.

658 [31] Khamis AG, Mwanri AW, Kreppel K, Kwesigabo G. The burden and correlates of childhood  
659 undernutrition in Tanzania according to composite index of anthropometric failure. *BMC*  
660 *Nutrition*. 2020;6(1):1-13.

661 [32] Bhattarai S, Bhusal CK. Prevalence and associated factors of malnutrition among school going  
662 adolescents of Dang district, Nepal. *AIMS Public Health*. 2019;6(3):291.

663 [33] Mann DM, Swahn MH, McCool S. Undernutrition and malaria among under-five children: findings  
664 from the 2018 Nigeria demographic and health survey. *Pathogens and Global Health*. 2021;115(6):423-  
665 33.

666 [34] Arzika AM, Maliki R, Boubacar N, Kane S, Cook CA, Lebas E, et al. Malaria parasitemia and nutritional  
667 status during the low transmission season in the presence of azithromycin distribution among  
668 preschool children in Niger. *The American journal of tropical medicine and hygiene*. 2020;103(3):1315.

- 669 [35] Gone T, Lemango F, Eliso E, Yohannes S, Yohannes T. The association between malaria and mal-  
670 nutrition among under-five children in Shashogo District, Southern Ethiopia: a case-control study.  
671 *Infectious diseases of poverty*. 2017;6(1):1-8.
- 672 [36] Yassin MA, Soliman AT, De Sanctis V, Yassin KS, Abdulla MA. Final height and endocrine complications  
673 in patients with  $\beta$ -thalassemia intermedia: our experience in non-transfused versus infrequently  
674 transfused patients and correlations with liver iron content. *Mediterranean Journal of Hematology*  
675 *and Infectious Diseases*. 2019;11(1).
- 676 [37] Harding KL, Aguayo VM, Webb P. Factors associated with wasting among children under five years  
677 old in South Asia: Implications for action. *PloS one*. 2018;13(7):e0198749.
- 678 [38] Nshimiyiryo A, Hedt-Gauthier B, Mutaganzwa C, Kirk CM, Beck K, Ndayisaba A, et al. Risk factors  
679 for stunting among children under five years: a cross-sectional population-based study in Rwanda  
680 using the 2015 Demographic and Health Survey. *BMC public health*. 2019;19(1):1-10.
- 681 [39] Tariku EZ, Abebe GA, Melketsedik ZA, Gutema BT. Prevalence and factors associated with stunting  
682 and thinness among school-age children in Arba Minch Health and Demographic Surveillance Site,  
683 Southern Ethiopia. *PloS one*. 2018;13(11):e0206659.
- 684 [40] Scaglioni S, De Cosmi V, Ciappolino V, Parazzini F, Brambilla P, Agostoni C. Factors influencing  
685 children's eating behaviours. *Nutrients*. 2018;10(6):706.
- 686 [41] Snow R, Molyneux C, Njeru E, Omumbo J, Nevill C, Muniu E, et al. The effects of malaria control  
687 on nutritional status in infancy. *Acta Tropica*. 1997;65(1):1-10.
- 688 [42] Ntab B, Cissé B, Boulanger D, Sokhna C, Targett G, Lines J, et al. Impact of intermittent preventive  
689 anti-malarial treatment on the growth and nutritional status of preschool children in rural Senegal

690 (west Africa). The American journal of tropical medicine and hygiene. 2007;77(3):411.

691 [43] Torun B. Energy requirements of children and adolescents. Public health nutrition. 2005;8(7a):968-93.

692 **Appendix**

693 **Post trial**

694 Table 9: LMM results for height post trial

695

| Random effects       | Variance |  |  |  |  |
|----------------------|----------|--|--|--|--|
| Child id (intercept) | 38.2791  |  |  |  |  |
| School (intercept)   | 0.2333   |  |  |  |  |

  

| Fixed effect               | estimate | sd      | df   | t value | p-value |
|----------------------------|----------|---------|------|---------|---------|
| Residual                   |          | 10.4646 |      |         |         |
| Intercept                  | 93.7178  | 1.1818  | 954  | 79.30   | <.0001  |
| age                        | 4.1205   | 0.1208  | 1453 | 34.12   | <.0001  |
| sex: female                | 1.6766   | 0.3466  | 1448 | 4.84    | <.0001  |
| sex: male                  | Ref      |         |      |         |         |
| study_group: DP            | 0.1194   | 1.5825  | 1446 | 0.08    | 0.9398  |
| study_group: ASAQ          | 1.2918   | 1.6223  | 1449 | 0.80    | 0.4260  |
| study_group: standard care | Ref      |         |      |         |         |
| ses: high                  | 0.3755   | 0.3449  | 1449 | 1.09    | 0.2765  |
| ses: low                   | Ref      |         |      |         |         |
| age* DP                    | -0.08335 | 0.1665  | 1444 | -0.50   | 0.6167  |
| age* ASAQ                  | -0.2116  | 0.1695  | 1449 | -1.25   | 0.2120  |
| age* standard care         | Ref      |         |      |         |         |

696 Table 10: LMM for weight during post trial

697

| Random effects | Variance |  |  |  |  |
|----------------|----------|--|--|--|--|
|                | 40       |  |  |  |  |

|       |                            |                 |           |           |                |                |
|-------|----------------------------|-----------------|-----------|-----------|----------------|----------------|
| 698   | Child id (intercept)       |                 | 25.6139   |           |                |                |
| 699   | School (intercept)         |                 | 0.0130    |           |                |                |
| <hr/> |                            |                 |           |           |                |                |
|       | <b>Fixed effect</b>        | <b>estimate</b> | <b>sd</b> | <b>df</b> | <b>t value</b> | <b>p-value</b> |
| 700   | Residual                   |                 | 2.9475    |           |                |                |
| 701   | Intercept                  | 5.1482          | 0.9190    | 1460      | 5.60           | <.0001         |
| 702   | age                        | 2.5368          | 0.09513   | 1459      | 26.67          | <.0001         |
| 703   | sex: female                | 1.5232          | 0.2733    | 1457      | 5.57           | <.0001         |
| 704   | sex: male                  | Ref             |           |           |                |                |
| 705   | study_group: DP            | -1.8639         | 1.2488    | 1457      | -1.49          | 0.1358         |
| 706   | study_group: ASAQ          | 0.02393         | 1.2799    | 1459      | 0.02           | 0.9851         |
| 707   | study_group: standard care | Ref             |           |           |                |                |
| 708   | ses: high                  | 0.2968          | 0.2720    | 1458      | 1.09           | 0.2754         |
| 709   | ses: low                   | Ref             |           |           |                |                |
| 710   | age*DP                     | 0.1710          | 0.1314    | 1456      | 1.30           | 0.1934         |
| 711   | age*ASAQ                   | -0.04165        | 0.1337    | 1459      | -0.31          | 0.7555         |
| <hr/> |                            |                 |           |           |                |                |
| 712   | age*standard care          | Ref             |           |           |                |                |

713 Table 11: LMM results for bmi post trial

|     | Random effects       | Variance |
|-----|----------------------|----------|
| 714 | Child id (intercept) | 0.8612   |
|     | School (intercept)   | 0.0211   |

| Fixed effect               | estimate | sd     | df     | t value | p-value |
|----------------------------|----------|--------|--------|---------|---------|
| Residual                   |          |        | 114.59 |         |         |
| Intercept                  | 12.0093  | 1.2986 | 1924   | 9.25    | <.0001  |
| age                        | 0.4086   | 0.1344 | 1925   | 3.04    | 0.0024  |
| sex: female                | 0.7334   | 0.3854 | 1930   | 1.90    | 0.0572  |
| sex: male                  | Ref      |        |        |         |         |
| study_group: DP            | -1.0543  | 1.7561 | 1908   | -0.60   | 0.5483  |
| study_group: ASAQ          | 1.2705   | 1.8052 | 1917   | 0.70    | 0.4817  |
| study_group: standard care | Ref      |        |        |         |         |
| ses: high                  | 0.4647   | 0.3840 | 1936   | 1.21    | 0.2263  |
| ses: low                   | Ref      |        |        |         |         |
| age*DP                     | 0.1101   | 0.1845 | 1901   | 0.60    | 0.5506  |
| age*ASAQ                   | -0.09210 | 0.1886 | 1916   | -0.49   | 0.6254  |
| age*standard care          | Ref      |        |        |         |         |

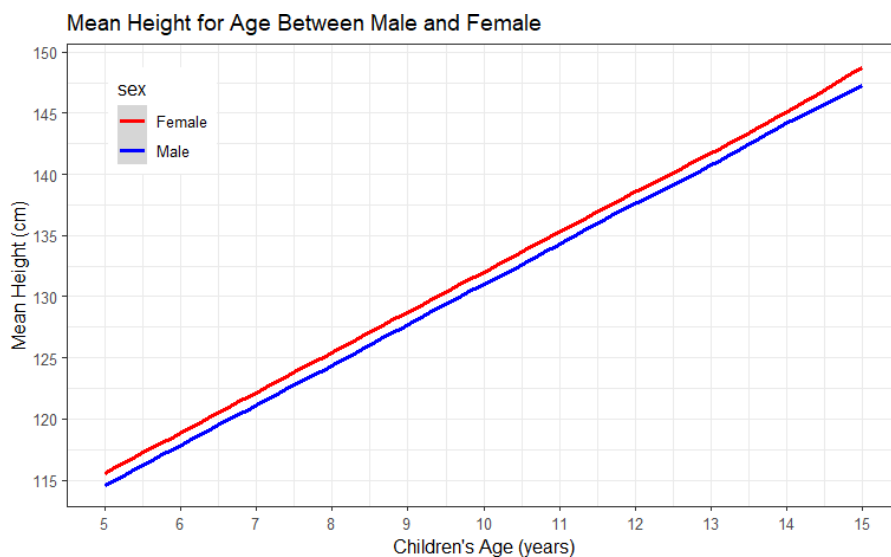



716

Figure 5: The trend of Height-for-age of school-age children grouped by sex

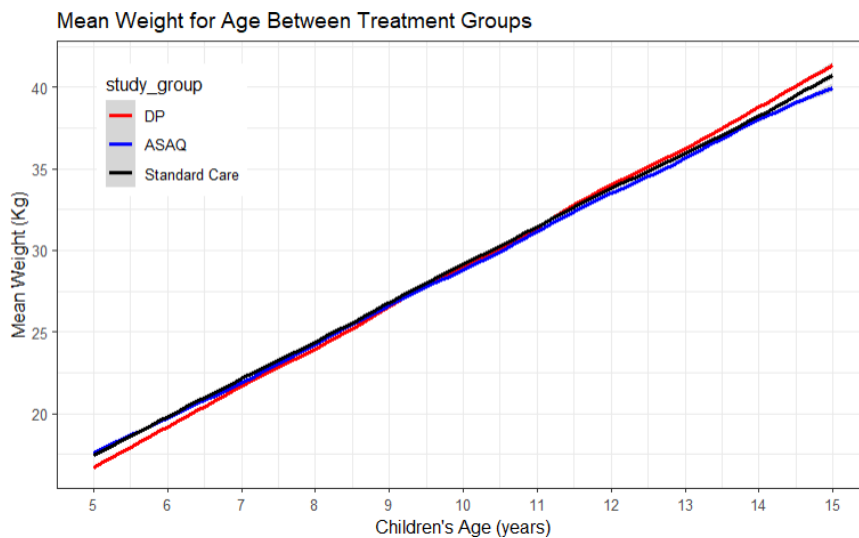

717

718

Figure 6: The trend of mean weight-for-age of school-age children grouped by treatment

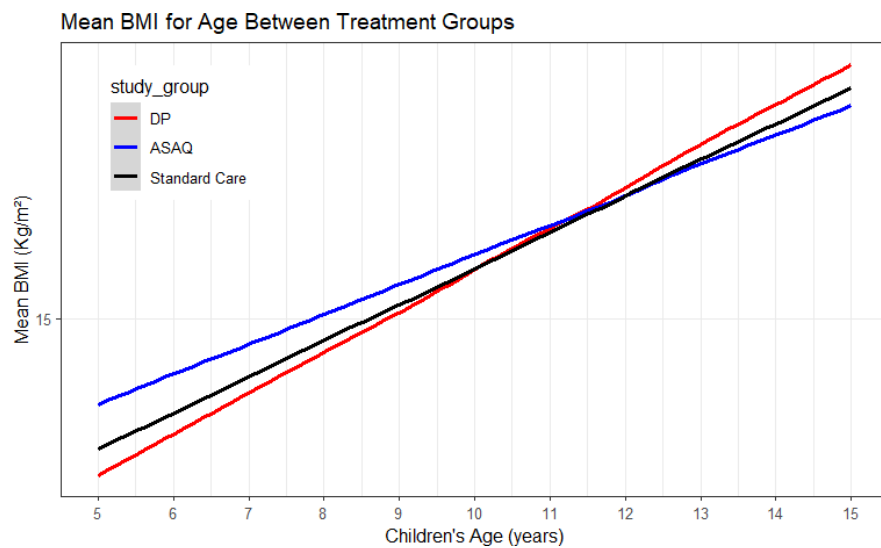

719

720

Figure 7: The trend of BMI-for-age of school-age children grouped by treatment

721

## Residual plots

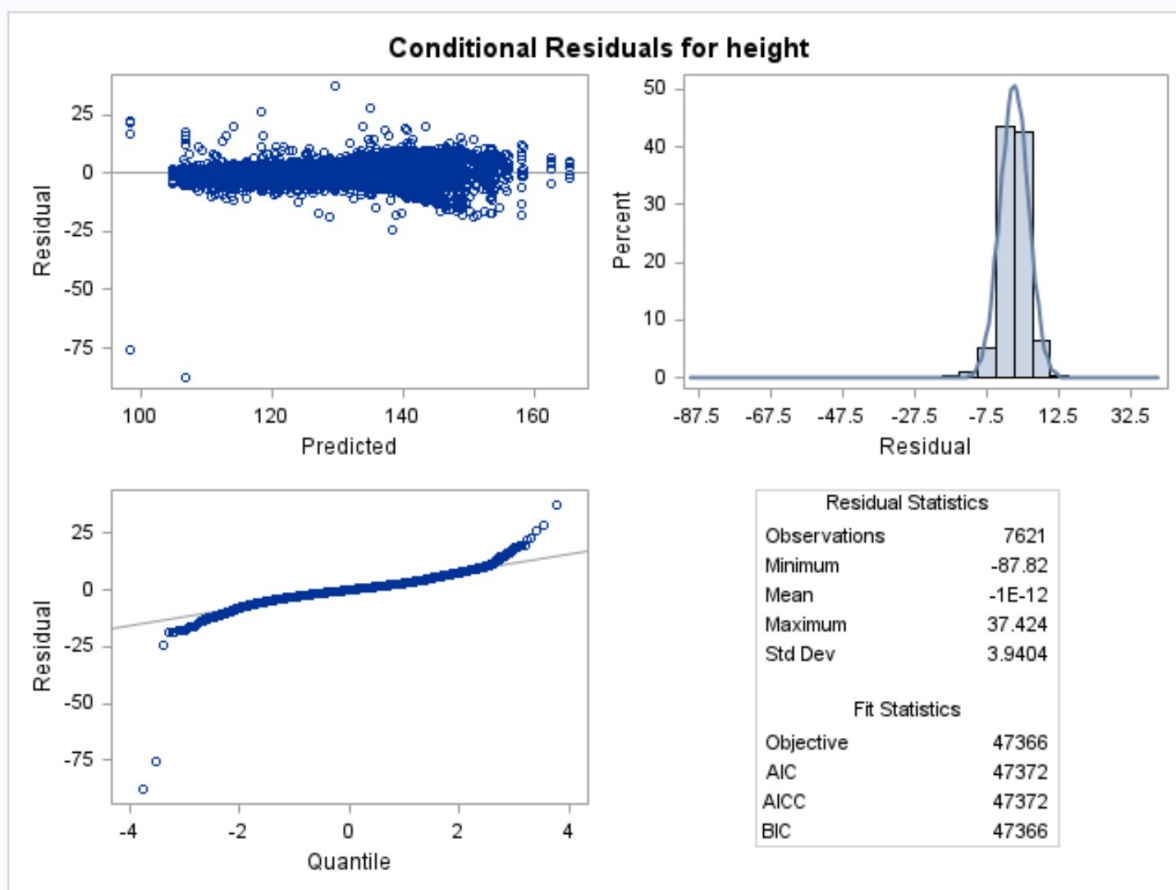

722

723

Figure 8: Residual plot for height

724

Table 12: AIC for LMM with different random effects

| Models | child id  | school    | age   | AIC     |
|--------|-----------|-----------|-------|---------|
| 1      | intercept | intercept | slope | 48377.6 |
| 2      | intercept | intercept | -     | 47372.3 |

|   |           |   |       |         |
|---|-----------|---|-------|---------|
| 3 | intercept | - | slope | 47423.7 |
| 4 | intercept | - | -     | 48371.4 |

---

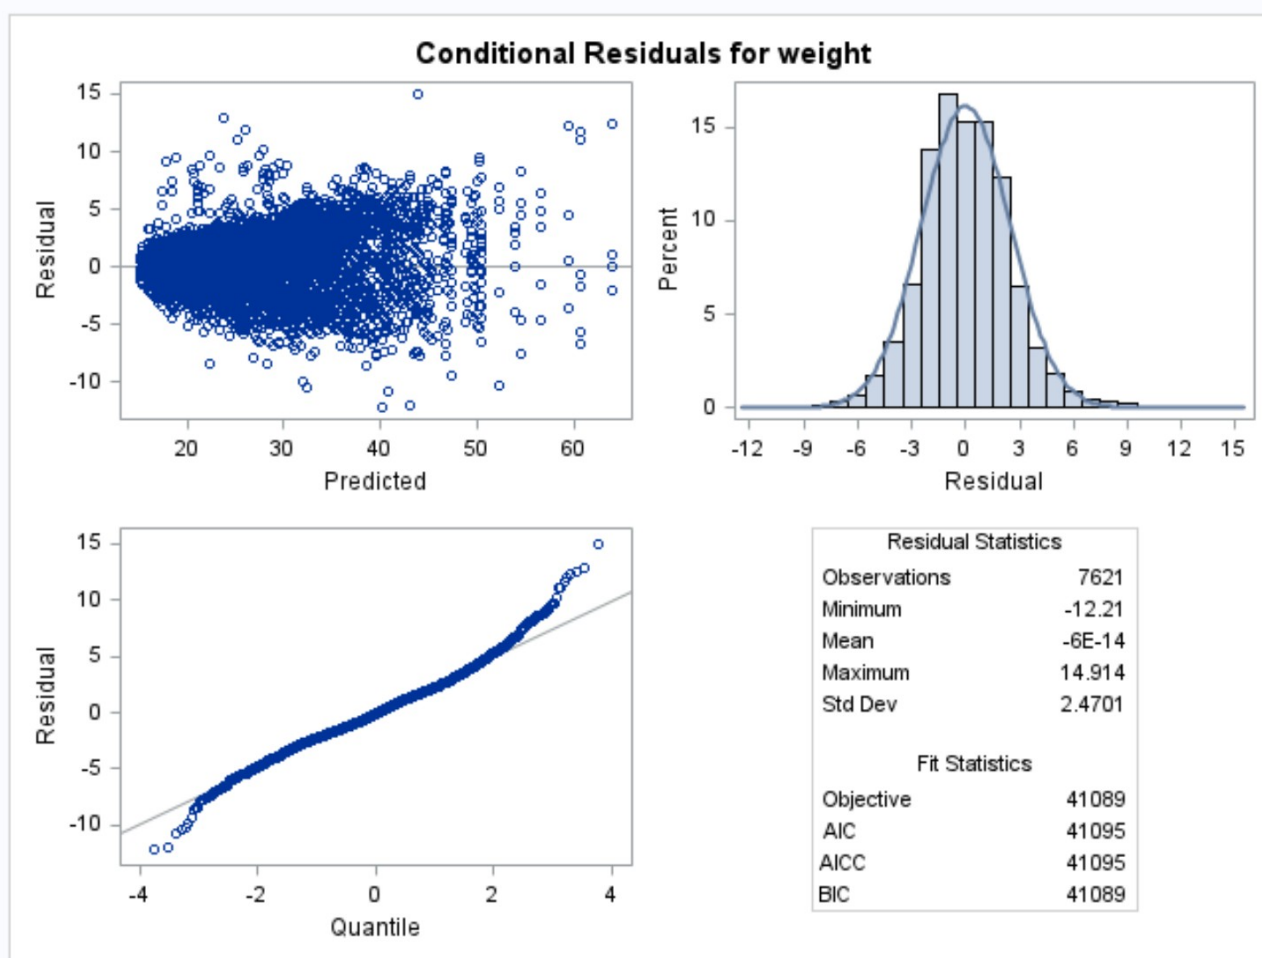

725

726

Figure 9: Residual plot for weight

727

Table 13: Comparing AIC values for models with and without quadratic term of age

| <b>Height</b>           | <b>df</b> | <b>AIC</b> |
|-------------------------|-----------|------------|
| Model1_age              | 8         | 29839.3    |
| Model2_age <sup>2</sup> | 9         | 29837.5    |
| <b>Weight</b>           |           |            |
| Model1_age              | 8         | 24648.78   |
| Model2_age <sup>2</sup> | 9         | 24647.02   |
| <b>BMI</b>              |           |            |
| Model1_age              | 8         | 30711.92   |
| -                       |           |            |
| Model2_age <sup>2</sup> | 9         | 30711.50   |
